# Supplementary material for: Technical efficiency of women’s health prevention programs in Bucaramanga, Colombia: a four-stage analysis
Source: BMC Health Serv Res. 2016 Oct 13;16:576. doi: 10.1186/s12913-016-1837-0 (PMC5064969; doi:10.1186/s12913-016-1837-0)
Supplement: Additional file 1: — Input and output variables for DEA analysis in three women´s health programs. (XLS 47 kb) [file 12913_2016_1837_MOESM1_ESM.xls]

## Sheet: ANC program
Health Center	Personal expenses	Capital expenses	Recurrent good expenses	Total ANC consultations	Percent of adherence to Resolution 412	Sum of Inputs	Output/Input ratio
ANTONIA SANTOS	7.51834e+06	7.82353e+06	102532	335	69.6206	1.54444e+07	21.6907
BUCARAMANGA	4.50851e+06	2.25383e+06	103649	277	75.5156	6.86599e+06	40.3438
CAMPO HERMOSO	1.02466e+07	3.06931e+06	154186	656	78.4781	1.34701e+07	48.7006
COLORADOS	1.95026e+07	4.10251e+06	413544	1024	81.0382	2.40186e+07	42.6336
COMUNEROS	1.37088e+07	2.78284e+06	297341	784	73.4052	1.6789e+07	46.6973
ROSARIO	1.30142e+07	1.72053e+07	503631	1681	77.1794	3.07232e+07	54.7144
GAITAN	5.39753e+06	2.3785e+06	123226	358	75.8326	7.89926e+06	45.3207
GIRARDOT	3.60102e+07	7.34972e+06	586886	1628	76.4339	4.39468e+07	37.0448
IPC	2.51267e+07	6.96225e+06	650009	1694	71.8619	3.27389e+07	51.7427
KENNEDY	5.4556e+07	8.84784e+06	728285	2081	76.2961	6.41321e+07	32.4487
CONCORDIA	3.31443e+06	802426	47526	98	63.1298	4.16438e+06	23.5329
LA JOYA	1.11843e+07	1.44323e+06	55530	236	81.3117	1.2683e+07	18.6075
LIBERTAD	6.65681e+06	1.26985e+06	48100	108	77.542	7.97476e+06	13.5427
MORRORRICO	1.86444e+07	2.42584e+06	222783	643	77.1139	2.1293e+07	30.1977
MUTIS	7.80287e+06	5.33038e+06	360630	575	75.321	1.34939e+07	42.6119
PABLO VI	8.73397e+06	3.73938e+06	66414	270	71.3108	1.25398e+07	21.5315
REGADEROS	2.16707e+07	2.81264e+06	443568	953	79.0676	2.49269e+07	38.2318
SAN RAFAEL	1.63775e+07	1.70999e+06	138415	498	74.2835	1.82259e+07	27.3238
SANTANDER	3.12438e+06	949018	71767	101	76.7231	4.14516e+06	24.3657
TOLEDO PLATA	2.458e+07	7.31479e+06	263464	653	75.9798	3.21582e+07	20.3059
VILLA ROSA	2.40572e+07	4.4084e+06	294082	899	78.4922	2.87597e+07	31.2591

## Sheet: DCACU program
Health Center	Personal expenses	Capital expenses	Recurrent good expenses	Total number or citologies	Proportion of women with 3:1 squeme	Sum of Inputs	Output/Input ratio*1000000
ANTONIA SANTOS	4.6856e+06	3.59891e+06	523060	316	0.756098	8.80758e+06	36.4459
BUCARAMANGA	3.79343e+06	2.09252e+06	551305	321	0.861111	6.43725e+06	91.9647
CAMPO HERMOSO	4.59515e+06	1.59005e+06	999648	592	0.666667	7.18485e+06	74.8798
COLORADOS	4.527e+06	1.59439e+06	973201	538	0.636364	7.09459e+06	117.836
COMUNEROS	8.49161e+06	2.46439e+06	1.4033e+06	836	0.875	1.23593e+07	116.026
EL ROSARIO	1.28752e+07	1.08353e+07	2.38578e+06	1434	0.625	2.60962e+07	19.5431
GAITAN	8.38136e+06	2.64097e+06	854461	510	0.552632	1.18768e+07	133.201
GIRARDOT	1.0273e+07	5.2198e+06	2.67038e+06	1582	0.742857	1.81632e+07	52.5788
IPC	6.79272e+06	2.83724e+06	1.63437e+06	955	0.84375	1.12643e+07	81.8513
KENNEDY	6.79272e+06	3.79734e+06	1.60003e+06	922	0.866667	1.21901e+07	18.2115
LA CONCORDIA	1.74143e+06	1.88114e+06	405861	222	0.756098	4.02843e+06	130.075
LA JOYA	1.39405e+07	2.80141e+06	877671	524	0.714286	1.76196e+07	19.921
LA LIBERTAD	5.62961e+06	2.77841e+06	592105	351	0.861111	9.00012e+06	66.2213
MORRORRICO	7.22842e+06	2.15018e+06	1.02212e+06	596	0.685714	1.04007e+07	96.7241
MUTIS	1.61349e+07	5.68694e+06	1.69187e+06	1006	0.846154	2.35137e+07	19.8608
PABLO VI	8.21411e+06	4.39163e+06	822117	467	0.868421	1.34279e+07	47.5132
REGADEROS	2.83973e+06	2.22852e+06	1.09375e+06	638	0.828571	6.162e+06	83.4145
SAN RAFAEL	5.96576e+06	2.68332e+06	854858	514	0.294118	9.50393e+06	18.6239
SANTANDER	3.48285e+06	1.46031e+06	325973	177	0.757576	5.26914e+06	135.886
TOLEDO PLATA	2.14056e+07	4.62303e+06	1.19734e+06	716	0.823529	2.72259e+07	14.8021
VILLA ROSA	8.51562e+06	2.07543e+06	716731	403	0.594595	1.13078e+07	57.3562

## Sheet: FP progrma
Health Center	Personal expenses	Capital expenses	Recurrent good expenses	No. of counseling visits	Proportion counseling coverage	sum inputs	output/input ratio*1000000
ANTONIA SANTOS	9.97118e+06	2.32195e+07	5876105	706	0.833333	3.90668e+07	18.0716
BUCARAMANGA	1.21549e+07	5.5397e+06	9.71484e+06	916	0.777778	2.74095e+07	33.4191
CAMPO HERMOSO	1.02166e+07	1.05245e+07	19816072	1058	0.791667	4.05573e+07	26.0866
COLORADOS	1.34728e+07	5.01708e+06	14491152	1703	0.636364	3.2981e+07	51.6358
COMUNEROS	1.11546e+07	9.944e+06	1.65449e+07	1664	0.8	3.76435e+07	44.2041
CONCORDIA	1.83531e+06	3.12437e+06	2.09867e+07	1377	0.521739	2.59464e+07	53.071
EL ROSARIO	1.21062e+07	3.72186e+07	13069852	920	0.633333	6.23946e+07	14.7449
GAITAN	8.00832e+06	3.36348e+06	31437970	2516	0.8	4.28098e+07	58.7716
GIRARDOT	1.27586e+07	2.52039e+07	3.54085e+07	2186	0.736842	7.33709e+07	29.7938
IPC	5.07273e+06	6.97656e+06	3.04483e+07	1939	0.875	4.24976e+07	45.6261
KENNEDY	5.02631e+06	1.00001e+07	3501547	168	0.833333	1.85279e+07	9.0674
LA JOYA	1.06933e+07	4.83769e+06	1.3563e+07	748	0.863636	2.9094e+07	25.7097
LA LIBERTAD	8.33746e+06	6.18816e+06	8.89932e+06	437	1	2.34249e+07	18.6553
MORRORRICO	1.49451e+07	7.16377e+06	1.65577e+07	1833	0.619048	3.86665e+07	47.4053
MUTIS	2.09879e+07	2.55454e+07	5370540	1233	0.941176	5.19038e+07	23.7555
PABLO VI	1.1133e+07	1.03138e+07	7.23044e+06	758	0.88	2.86773e+07	26.4321
REGADEROS	1.09678e+07	4.26076e+06	1.5682e+07	1459	0.904762	3.09105e+07	47.2007
SAN RAFAEL	1.19498e+07	6.61412e+06	7.90755e+06	1254	0.5625	2.64715e+07	47.3717
SANTANDER	1.08686e+07	7.96774e+06	1.37985e+07	697	0.916667	3.26349e+07	21.3575
TOLEDO PLATA	2.39964e+07	4.05274e+07	15416879	1003	0.7	7.99407e+07	12.5468
VILLA ROSA	9.79199e+06	4.95184e+06	19062992	1173	0.7	3.38068e+07	34.6971
